# Supplementary material
Source: Springer Nature journal article supplement (https://www.springermedizin.de/resource/supplementary/12894_2014_333_MOESM2_ESM.pdf/9513530)

Biochemical recurrence-free survival

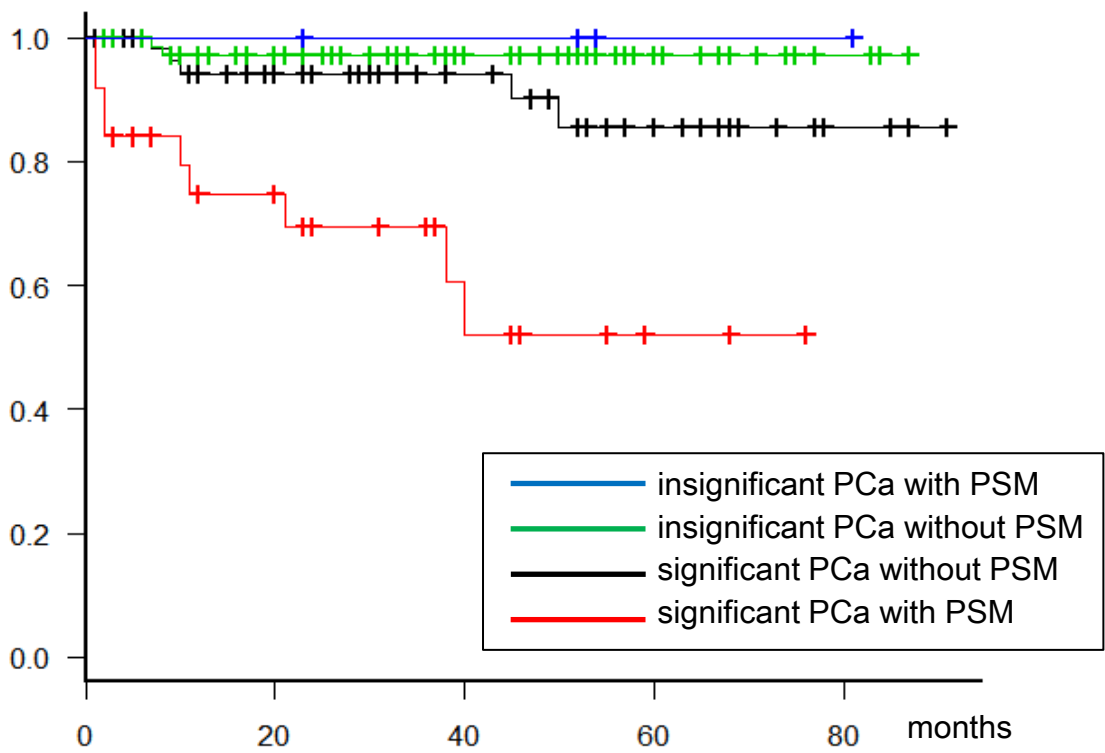

Supplement: MOESM2 [file 9513530]
